# Supplementary material for: Identification of respiratory microbiota markers in ventilator-associated pneumonia
Source: PubMed Central journal article supplement — Intensive Care Med. 2019 Jun 17;45(8):1082–92. doi: 10.1007/s00134-019-05660-8 (PMC6667422; doi:10.1007/s00134-019-05660-8), 2019-06-17

# OTU (Greengenes) taxonomy

Actinobacteria; Actinobacteria; Actinomycetales; Brevibacteriaceae; *Brevibacterium casei*  
 Actinobacteria; Actinobacteria; Actinomycetales; Corynebacteriaceae; *Corynebacterium*  
 Actinobacteria; Actinobacteria; Actinomycetales; Microbacteriaceae; *Microbacterium*  
 Actinobacteria; Actinobacteria; Actinomycetales; Microbacteriaceae; *Microbacterium chocolatum*  
 Actinobacteria; Actinobacteria; Actinomycetales; Propionibacteriaceae; *Propionibacterium granulosum*  
 Actinobacteria; Actinobacteria; Actinomycetales; Streptomycesaceae; *Streptomyces*  
 Bacteroidetes; [Saprosirae]; [Saprosirales]; Chitinophagaceae  
 Bacteroidetes; [Saprosirae]; [Saprosirales]; Chitinophagaceae; *Sediminibacterium*  
 Bacteroidetes; Bacteroidia; Bacteroidales; Porphyromonadaceae; *Porphyromonas*  
 Bacteroidetes; Bacteroidia; Bacteroidales; Prevotellaceae; *Prevotella*  
 Bacteroidetes; Bacteroidia; Bacteroidales; Prevotellaceae; *Prevotella melaninogenica*  
 Bacteroidetes; Bacteroidia; Bacteroidales; S24-7  
 Bacteroidetes; Flavobacteriia; Flavobacteriales; [Weeksellaceae]; *Wautersiella*  
 Firmicutes; Bacilli; Bacillales; Staphylococcaceae; *Staphylococcus aureus*  
 Firmicutes; Bacilli; Bacillales; Staphylococcaceae; *Staphylococcus epidermidis*  
 Firmicutes; Bacilli; Bacillales; Staphylococcaceae; *Staphylococcus epidermidis*  
 Firmicutes; Bacilli; Gemellales; Gemellaceae; *Gemella*  
 Firmicutes; Bacilli; Lactobacillales; Aerococcaceae; *Abiotrophia*  
 Firmicutes; Bacilli; Lactobacillales; Enterococcaceae; *Enterococcus*  
 Firmicutes; Bacilli; Lactobacillales; Lactobacillaceae; *Lactobacillus*  
 Firmicutes; Bacilli; Lactobacillales; Leuconostocaceae; *Weissella*  
 Firmicutes; Bacilli; Lactobacillales; Streptococcaceae; *Streptococcus*  
 Firmicutes; Bacilli; Lactobacillales; Streptococcaceae; *Streptococcus*  
 Firmicutes; Bacilli; Lactobacillales; Streptococcaceae; *Streptococcus*  
 Firmicutes; Bacilli; Lactobacillales; Streptococcaceae; *Streptococcus anginosus*  
 Firmicutes; Clostridia; Clostridiales; [Tissierellaceae]; *Anaerococcus*  
 Firmicutes; Clostridia; Clostridiales; Lachnospiraceae  
 Firmicutes; Clostridia; Clostridiales; Lachnospiraceae; *Moryella*  
 Firmicutes; Clostridia; Clostridiales; Peptostreptococcaceae  
 Firmicutes; Clostridia; Clostridiales; Veillonellaceae; *Veillonella dispar*  
 Fusobacteria; Fusobacteriia; Fusobacteriales; Fusobacteriaceae; *Fusobacterium*  
 Proteobacteria; Alphaproteobacteria; Rhodobacterales; Rhodobacteraceae; *Paracoccus marcusii*  
 Proteobacteria; Alphaproteobacteria; Rhodobacterales; Rhodobacteraceae; *Rubellimicrobium*  
 Proteobacteria; Alphaproteobacteria; Rickettsiales; mitochondria  
 Proteobacteria; Alphaproteobacteria; Sphingomonadales; Sphingomonadaceae; *Novosphingobium*  
 Proteobacteria; Alphaproteobacteria; Sphingomonadales; Sphingomonadaceae; *Novosphingobium*  
 Proteobacteria; Alphaproteobacteria; Sphingomonadales; Sphingomonadaceae; *Sphingomonas*  
 Proteobacteria; Betaproteobacteria; Burkholderiales; Comamonadaceae; *Curvibacter*  
 Proteobacteria; Betaproteobacteria; Burkholderiales; Oxalobacteraceae  
 Proteobacteria; Betaproteobacteria; Methylophilales; Methylophilaceae  
 Proteobacteria; Betaproteobacteria; Neisseriales; Neisseriaceae  
 Proteobacteria; Betaproteobacteria; Neisseriales; Neisseriaceae  
 Proteobacteria; Betaproteobacteria; Neisseriales; Neisseriaceae; *Neisseria*  
 Proteobacteria; Betaproteobacteria; Neisseriales; Neisseriaceae; *Neisseria*  
 Proteobacteria; Gammaproteobacteria; Enterobacteriales; Enterobacteriaceae  
 Proteobacteria; Gammaproteobacteria; Enterobacteriales; Enterobacteriaceae  
 Proteobacteria; Gammaproteobacteria; Enterobacteriales; Enterobacteriaceae; *Serratia marcescens*  
 Proteobacteria; Gammaproteobacteria; Enterobacteriales; Enterobacteriaceae; *Serratia marcescens*  
 Proteobacteria; Gammaproteobacteria; Pasteurellales; Pasteurellaceae; *Haemophilus influenzae*  
 Proteobacteria; Gammaproteobacteria; Pasteurellales; Pasteurellaceae; *Haemophilus influenzae*  
 Proteobacteria; Gammaproteobacteria; Pseudomonadales; Moraxellaceae; *Acinetobacter johnsonii*  
 Proteobacteria; Gammaproteobacteria; Pseudomonadales; Moraxellaceae; *Acinetobacter schindleri*  
 Proteobacteria; Gammaproteobacteria; Pseudomonadales; Pseudomonadaceae; *Pseudomonas*  
 Proteobacteria; Gammaproteobacteria; Pseudomonadales; Pseudomonadaceae; *Pseudomonas*  
 Proteobacteria; Gammaproteobacteria; Pseudomonadales; Pseudomonadaceae; *Pseudomonas*  
 Proteobacteria; Gammaproteobacteria; Pseudomonadales; Pseudomonadaceae; *Pseudomonas viridiflava*  
 Proteobacteria; Gammaproteobacteria; Xanthomonadales; Xanthomonadaceae; *Stenotrophomonas*  
 Proteobacteria; Gammaproteobacteria; Xanthomonadales; Xanthomonadaceae; *Stenotrophomonas*  
 Proteobacteria; Gammaproteobacteria; Xanthomonadales; Xanthomonadaceae; *Stenotrophomonas geniculata*  
 Tenericutes; Mollicutes; Mycoplasmatales; Mycoplasmataceae; *Mycoplasma*  
 TM7; TM7-3; I025; Rs-045

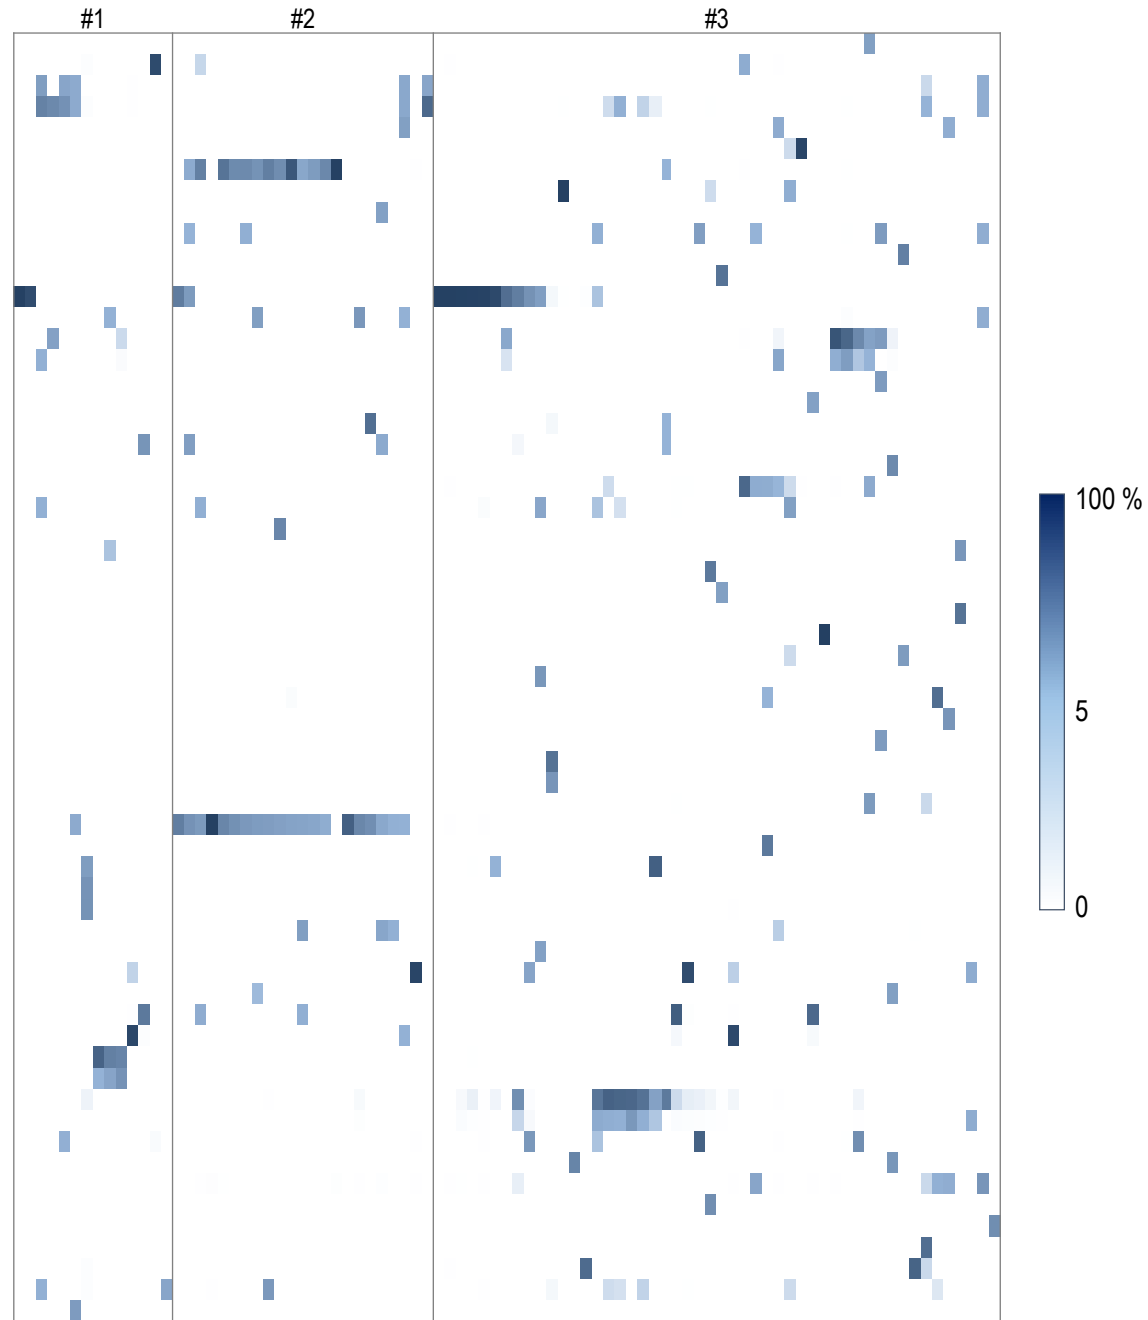

Supplement: 134_2019_5660_MOESM3_ESM.pdf [file 134_2019_5660_MOESM3_ESM.pdf]
