# Supplementary figures and images for: Identification of respiratory microbiota markers in ventilator-associated pneumonia
Source: PubMed Central journal article supplement — Intensive Care Med. 2019 Jun 17;45(8):1082–92. doi: 10.1007/s00134-019-05660-8 (PMC6667422; doi:10.1007/s00134-019-05660-8), 2019-06-17

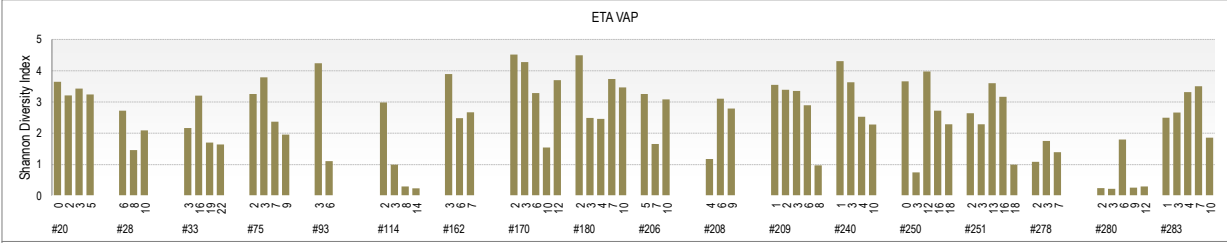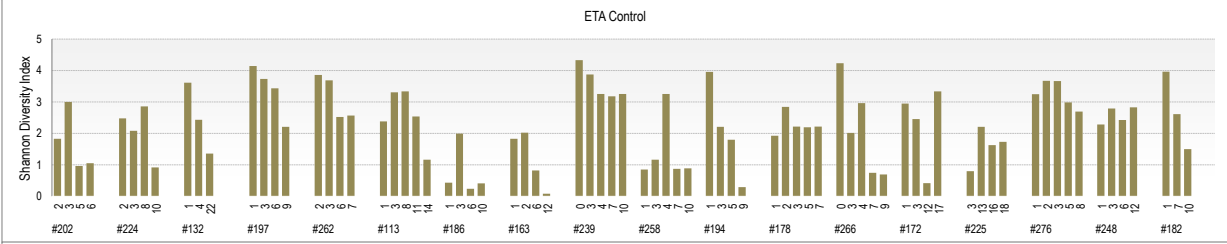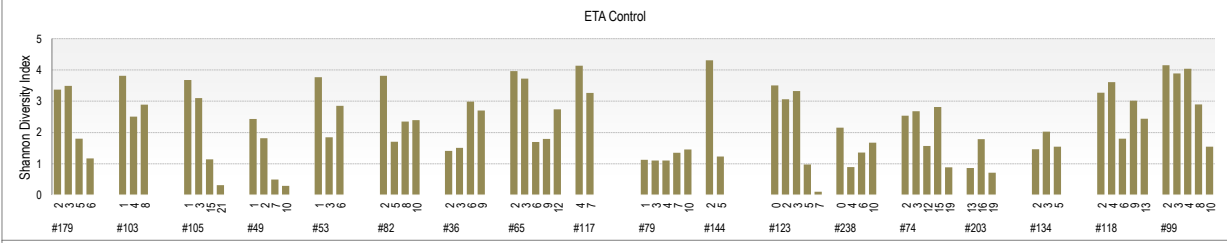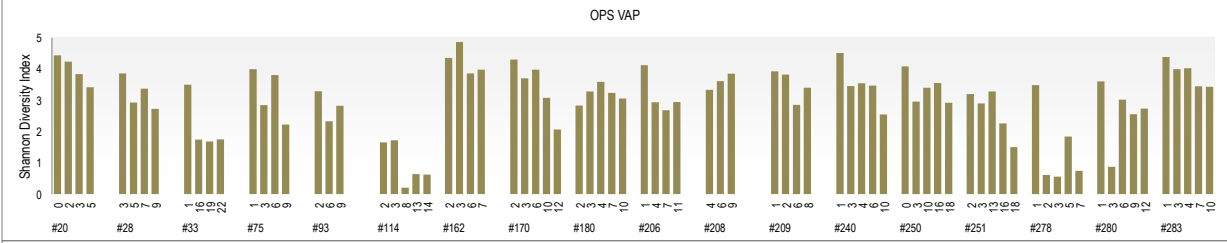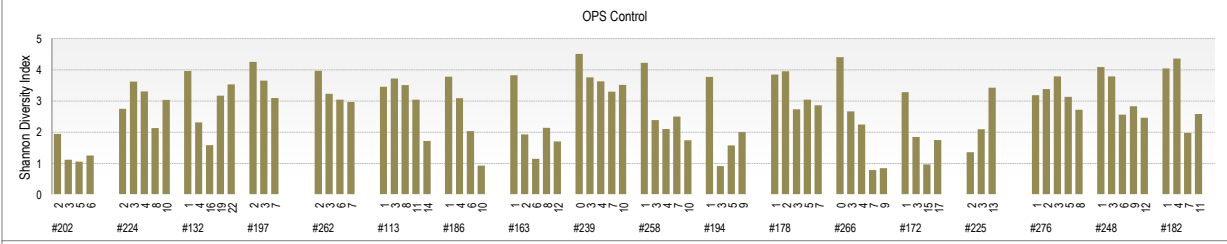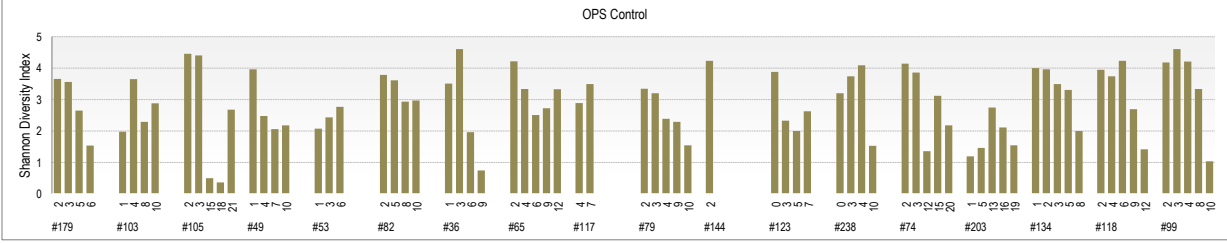

Supplement: 134_2019_5660_MOESM4_ESM.pdf [file 134_2019_5660_MOESM4_ESM.pdf]

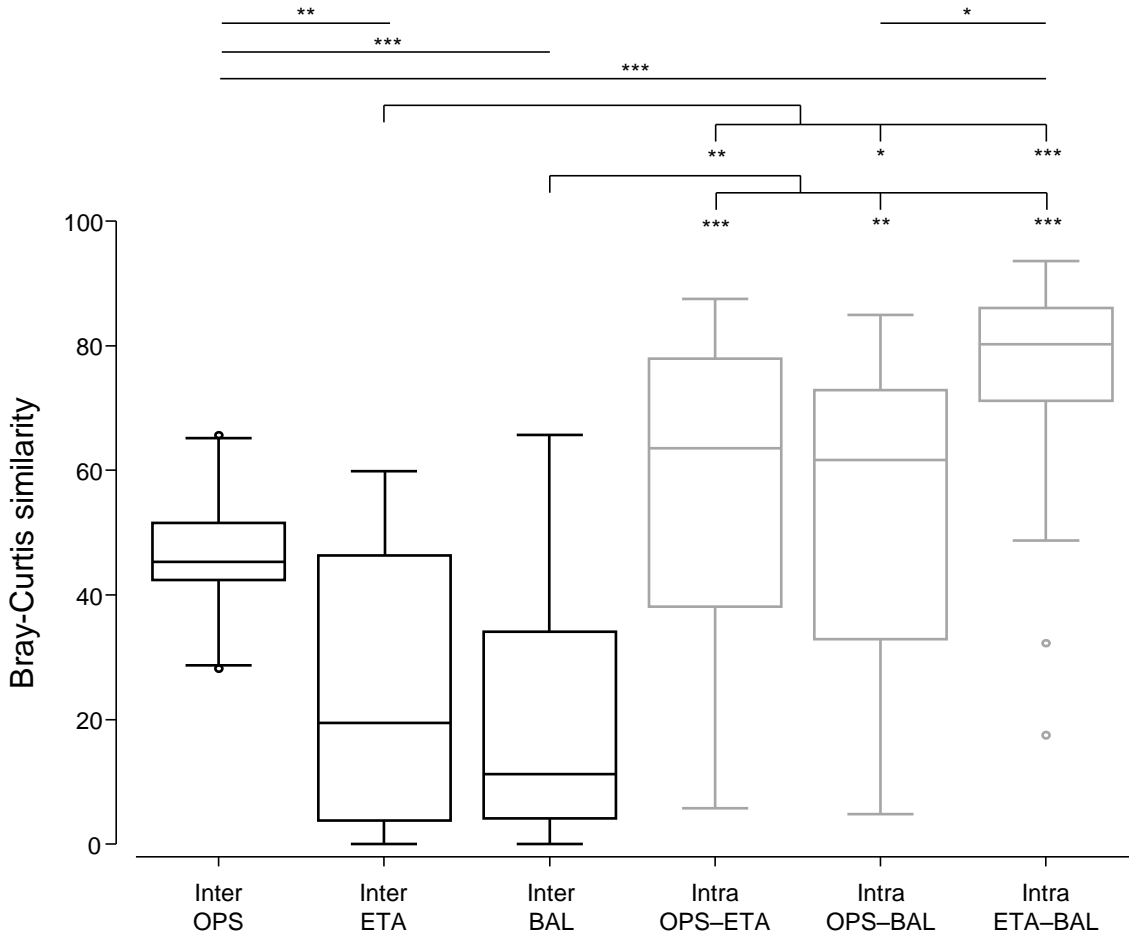

Supplement: 134_2019_5660_MOESM6_ESM.pdf [file 134_2019_5660_MOESM6_ESM.pdf]

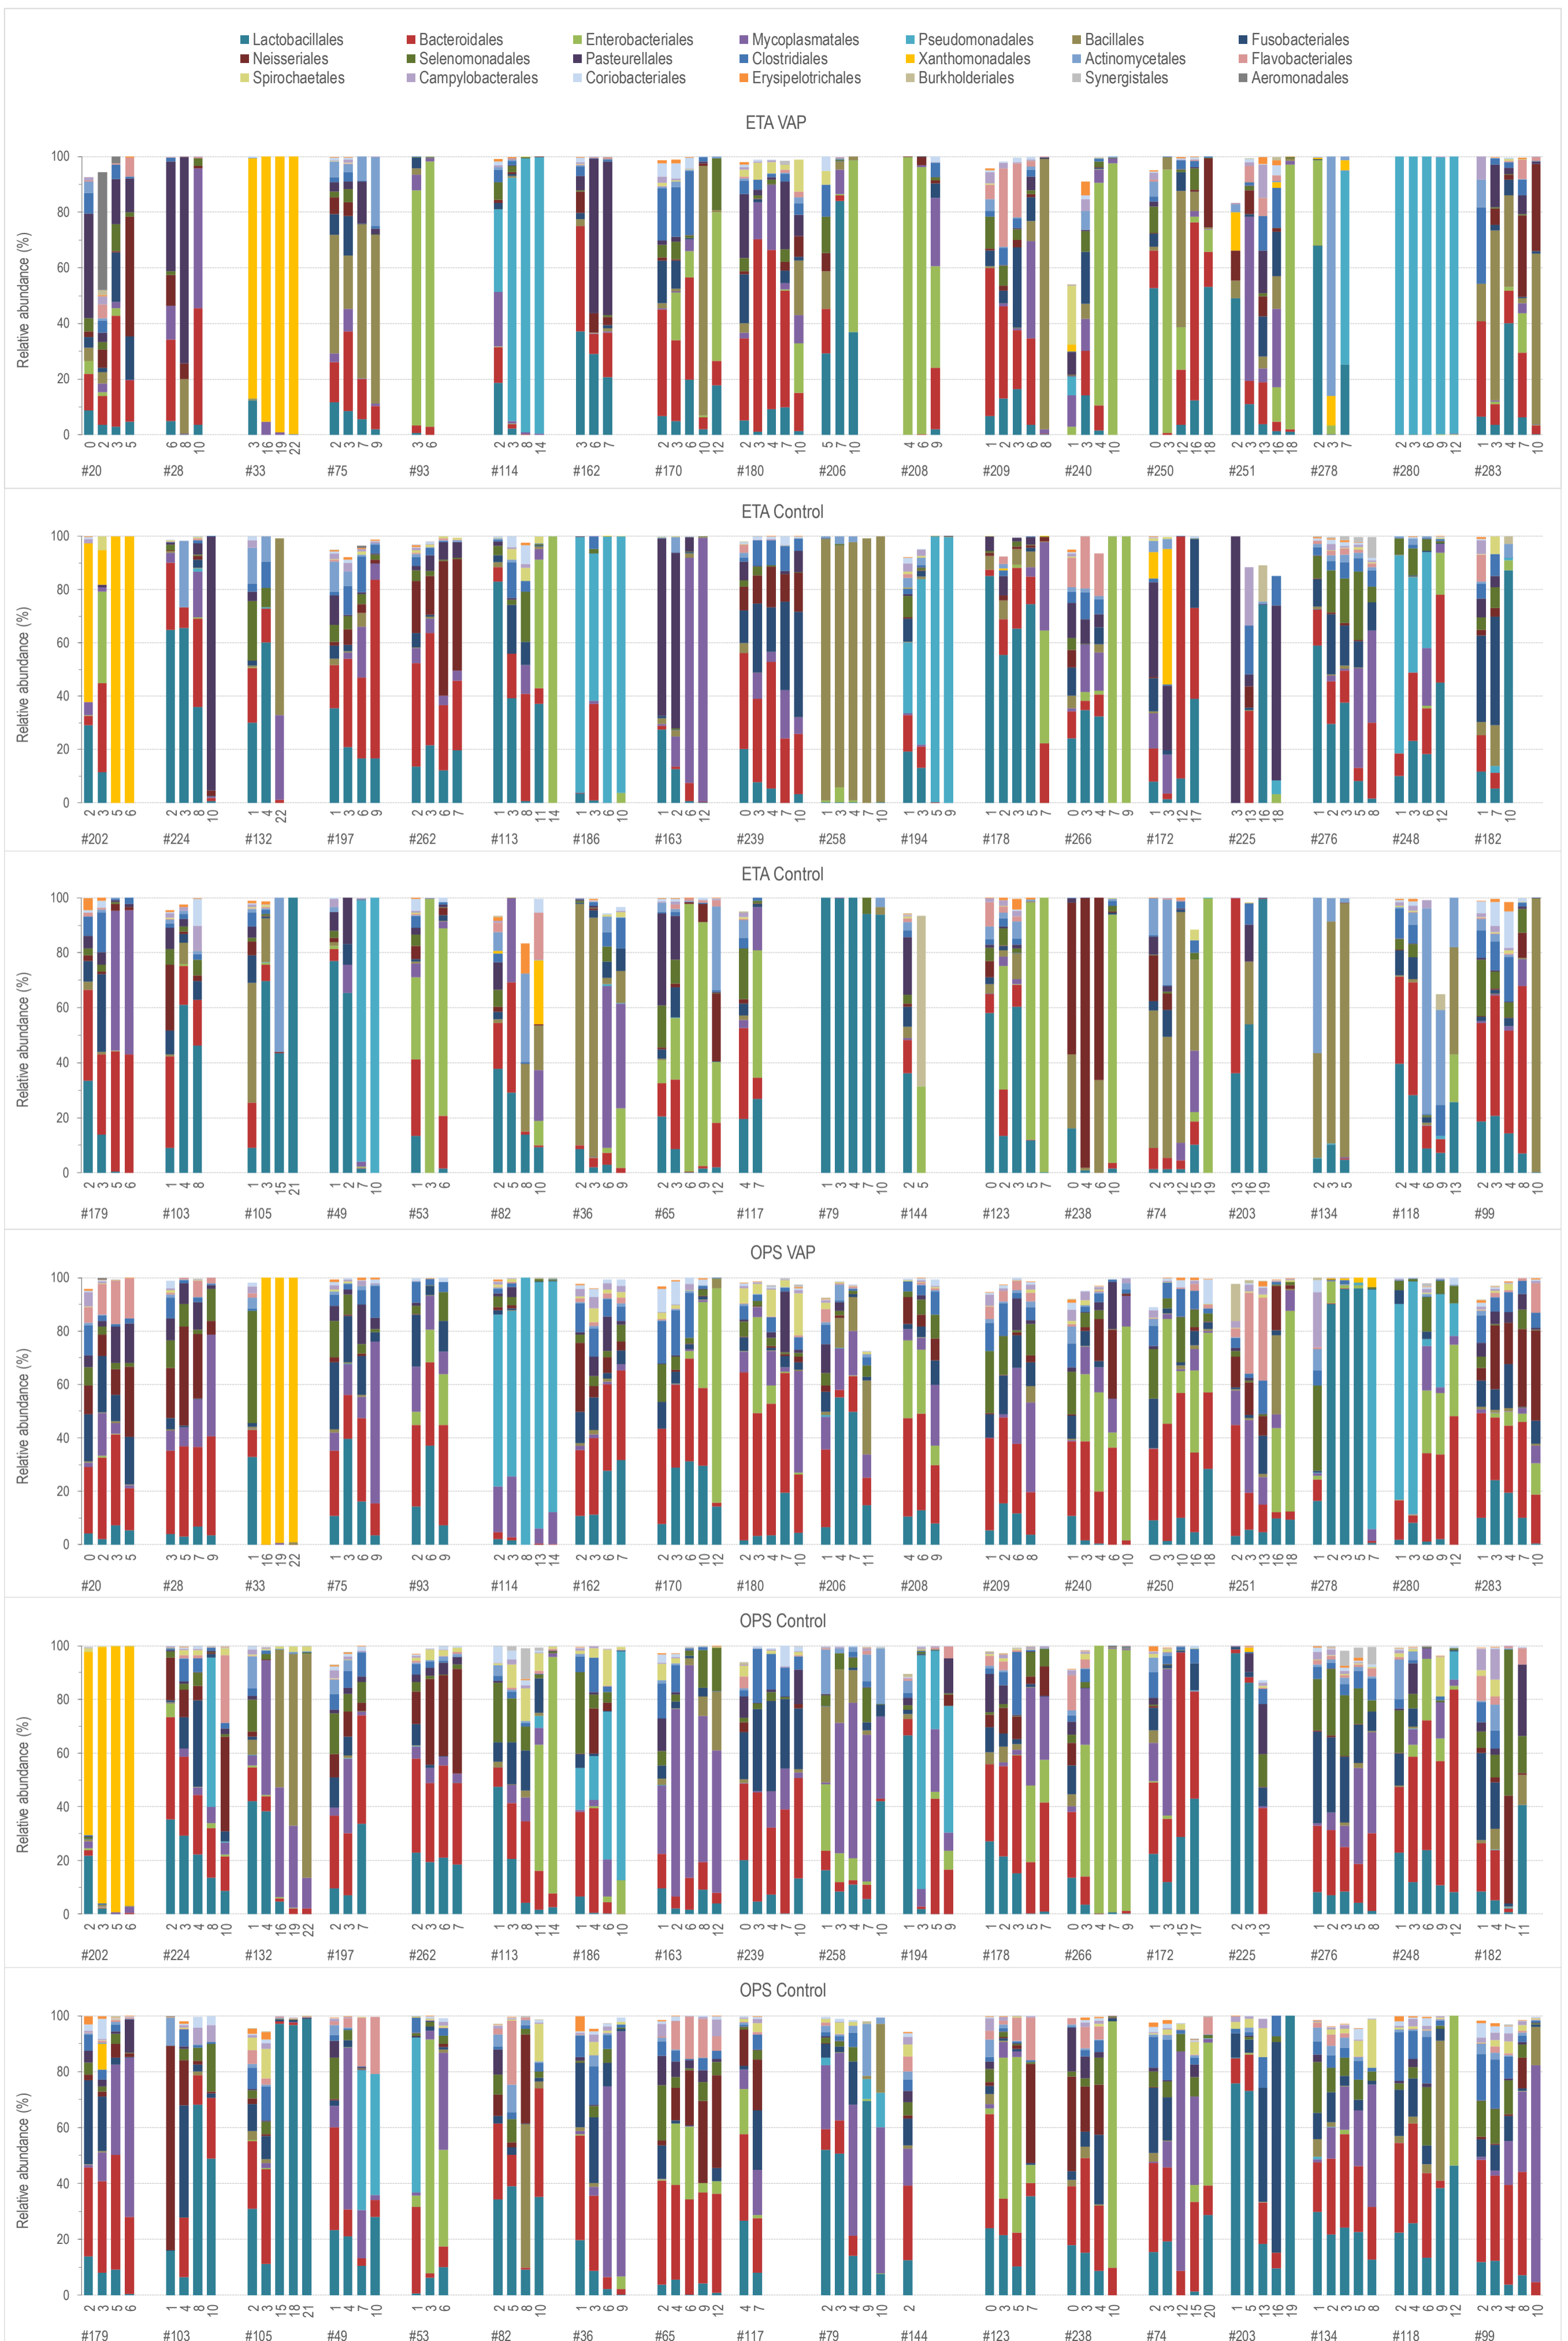

Supplement: 134_2019_5660_MOESM7_ESM.pdf [file 134_2019_5660_MOESM7_ESM.pdf]

A

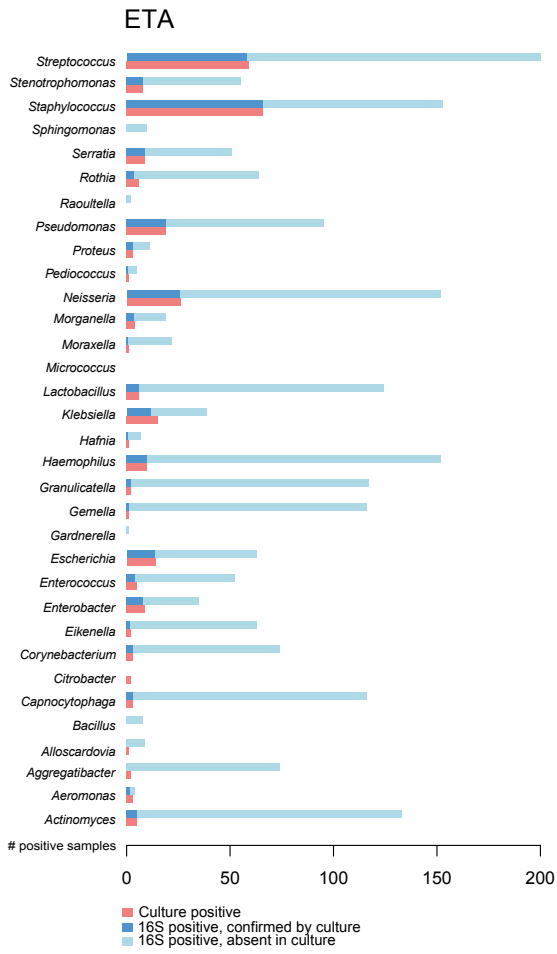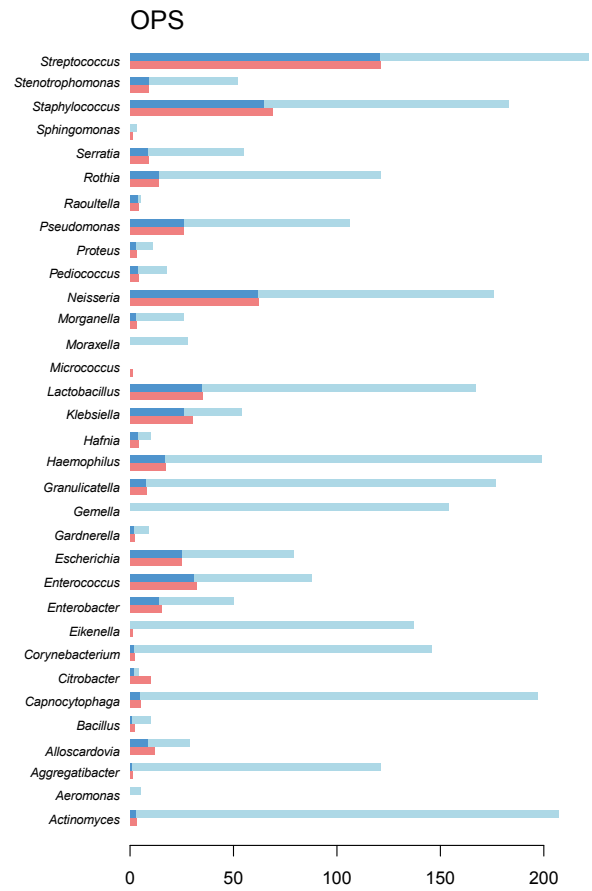

Supplement: 134_2019_5660_MOESM8_ESM.pdf [file 134_2019_5660_MOESM8_ESM.pdf]

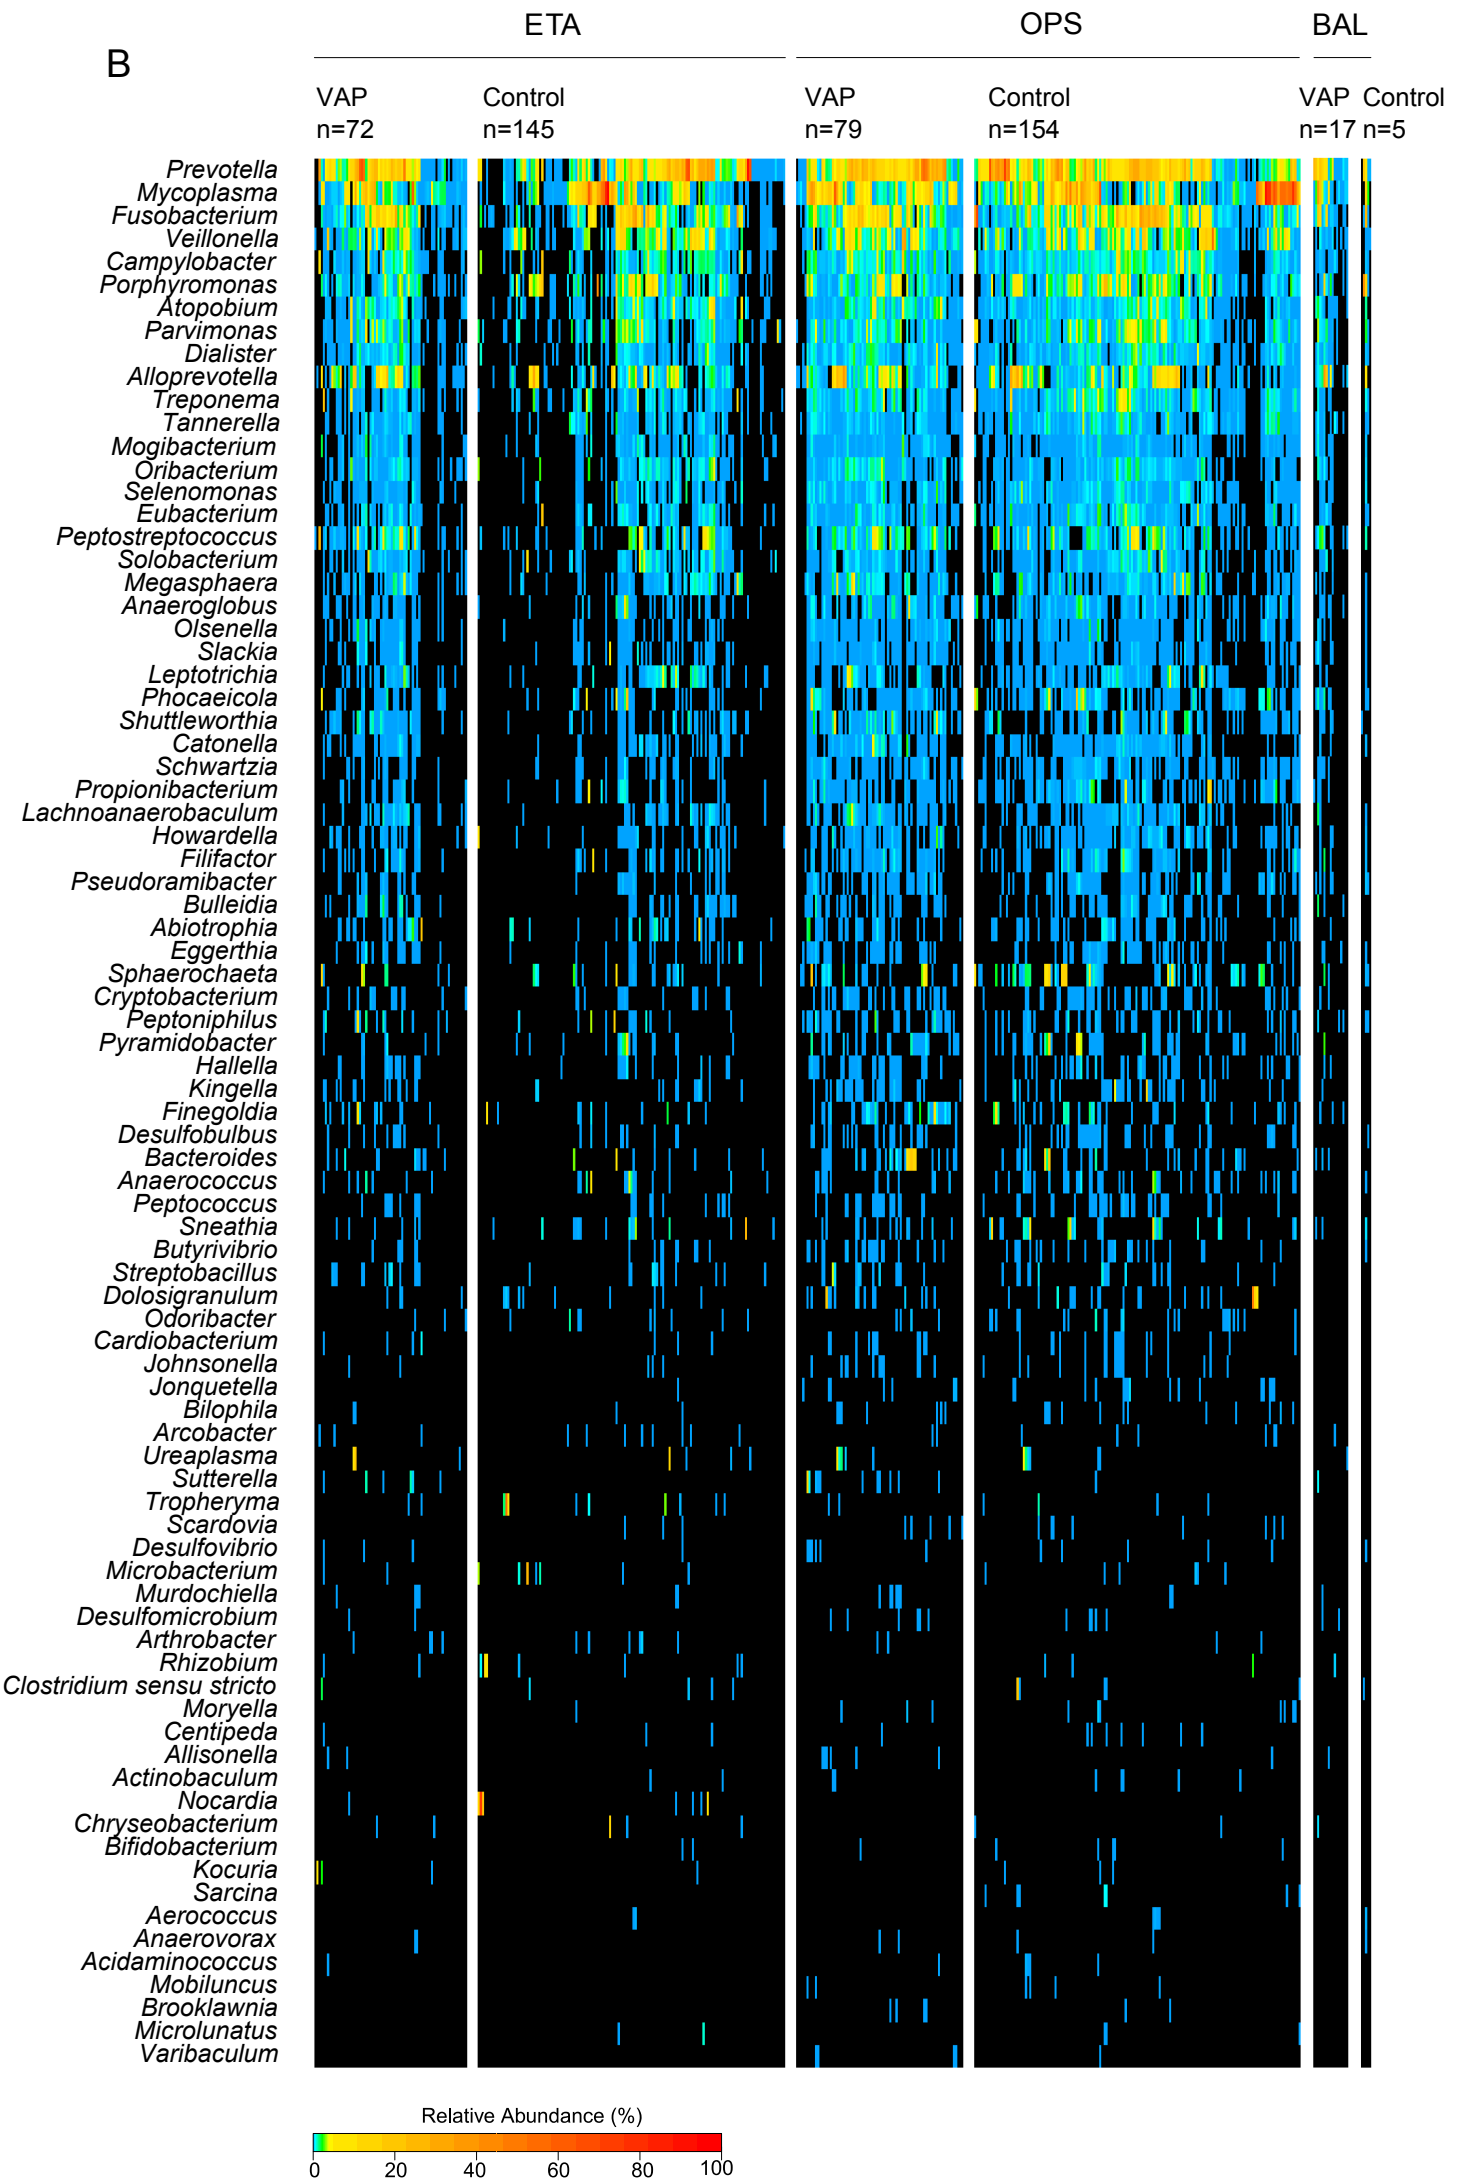

Supplement: 134_2019_5660_MOESM9_ESM.pdf [file 134_2019_5660_MOESM9_ESM.pdf]
